# Supplementary material for: Estrogen and G protein-coupled estrogen receptor accelerate the progression of benign prostatic hyperplasia by inducing prostatic fibrosis
Source: PubMed Central journal article supplement (PMC9174491; doi:10.1038/s41419-022-04979-3), 2022-06-07

**Fig. 3F**

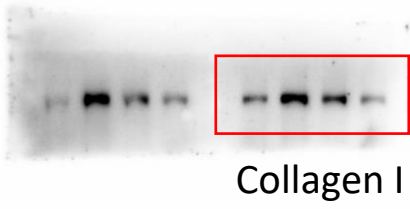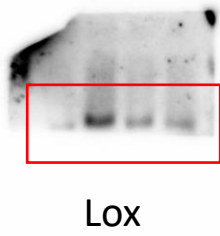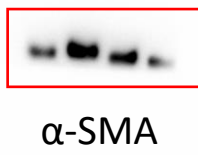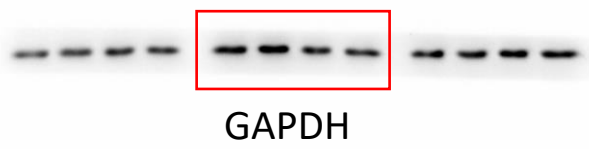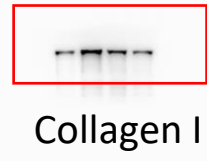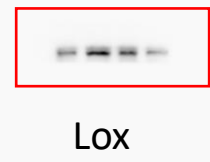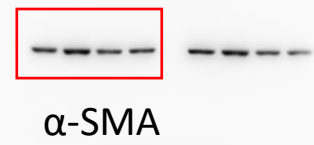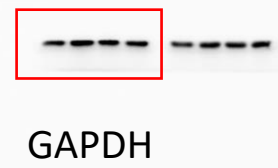

**Fig. 3G**

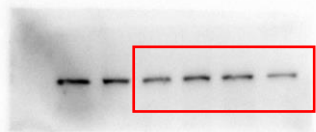

Collagen I

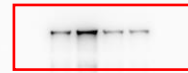

Collagen I

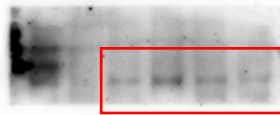

Lox

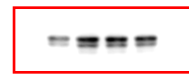

Lox

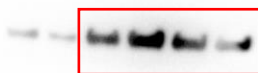

$\alpha$ -SMA

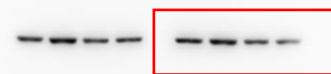

$\alpha$ -SMA

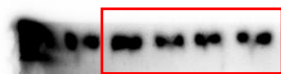

GAPDH

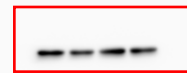

GAPDH

**Fig. 3H**

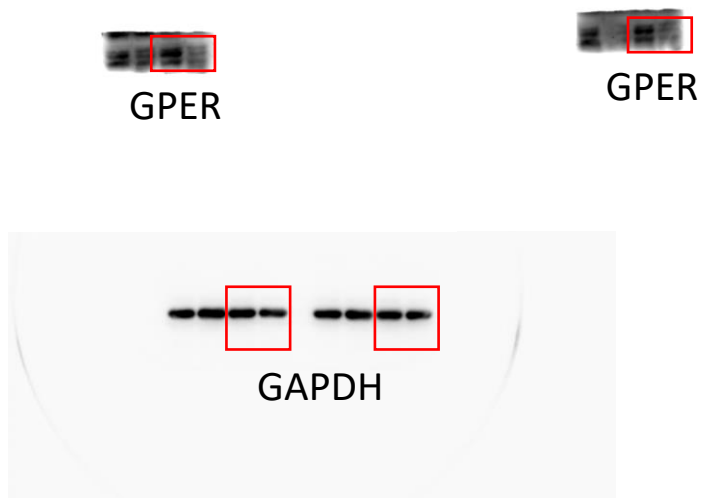

**Fig. 3I**

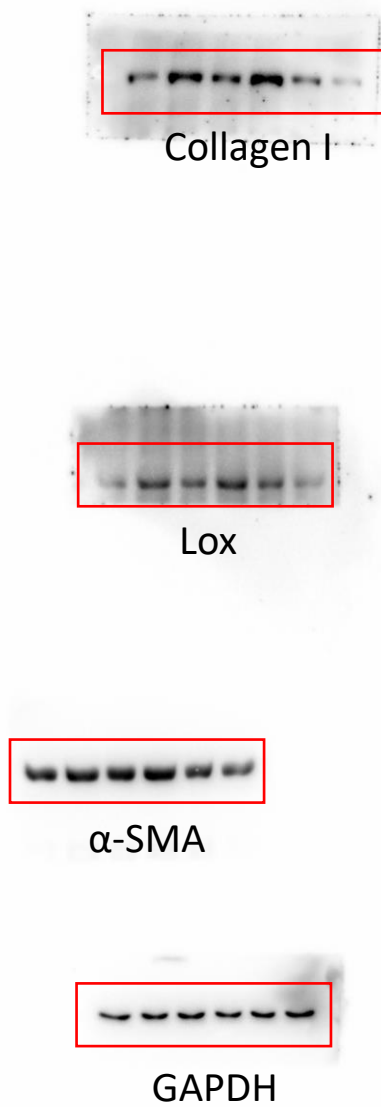

**Fig. 3J**

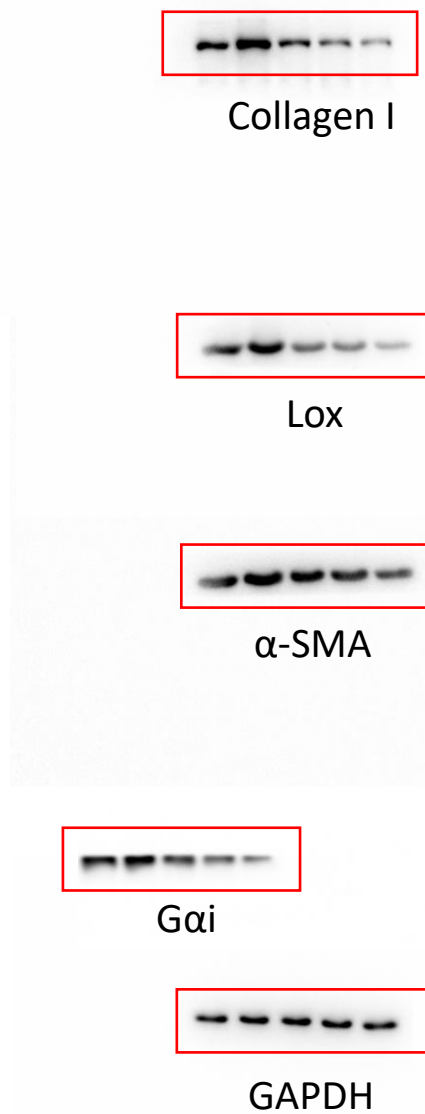

**Fig. 4A**

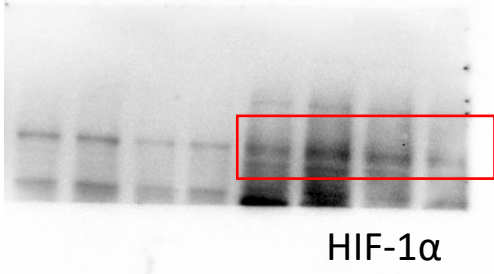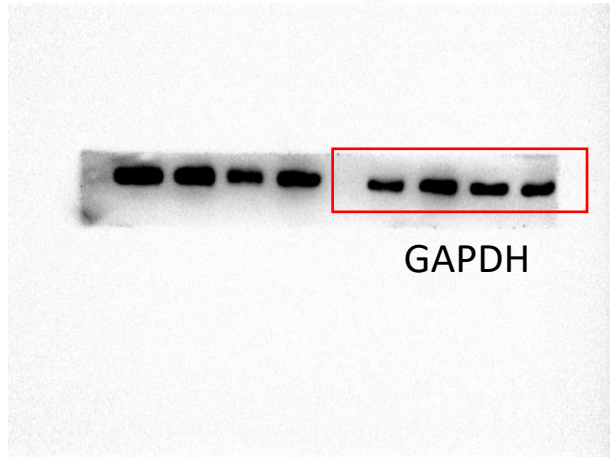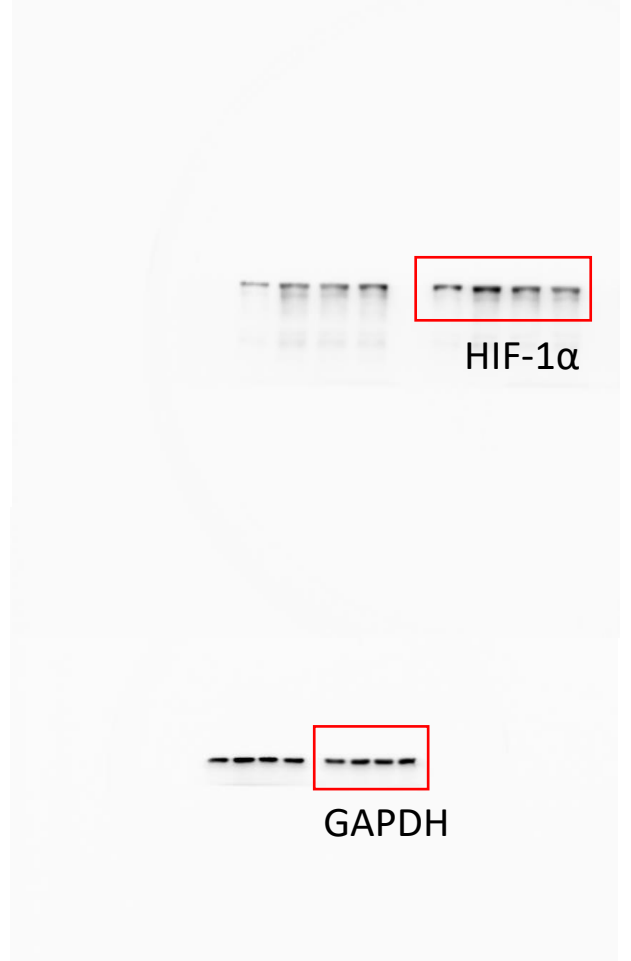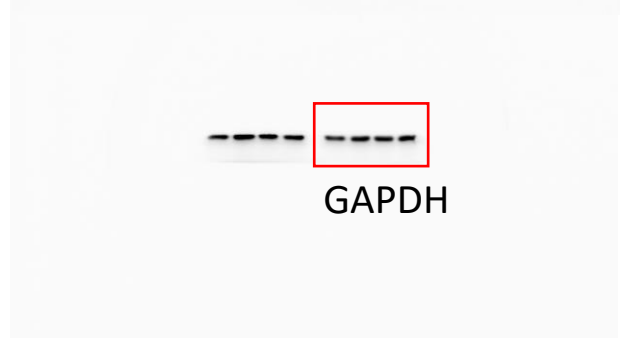

**Fig. 4B**

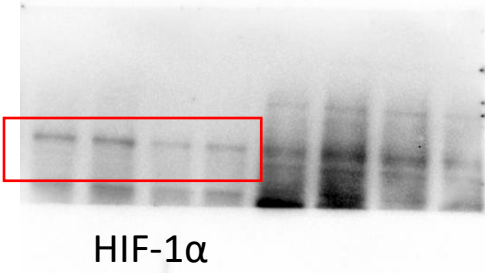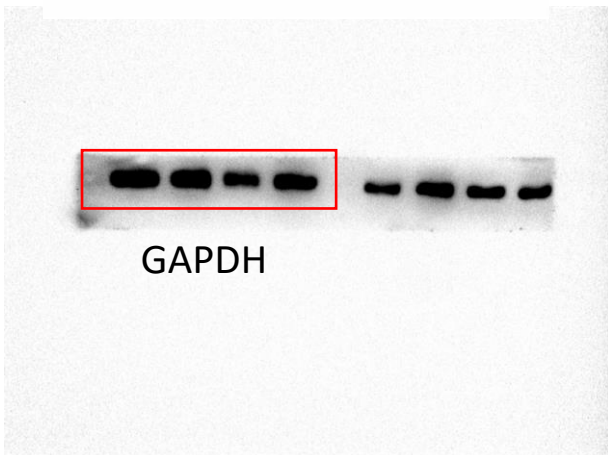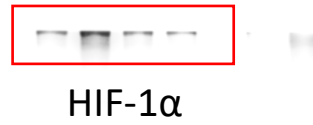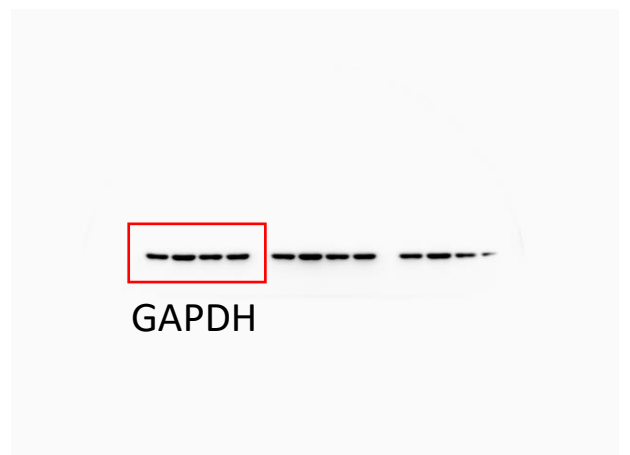

**Fig. 4C**

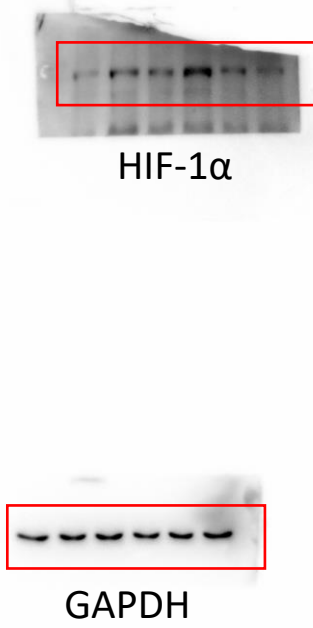

**Fig. 4D**

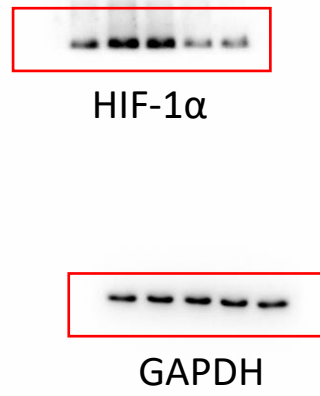

**Fig. 4F**

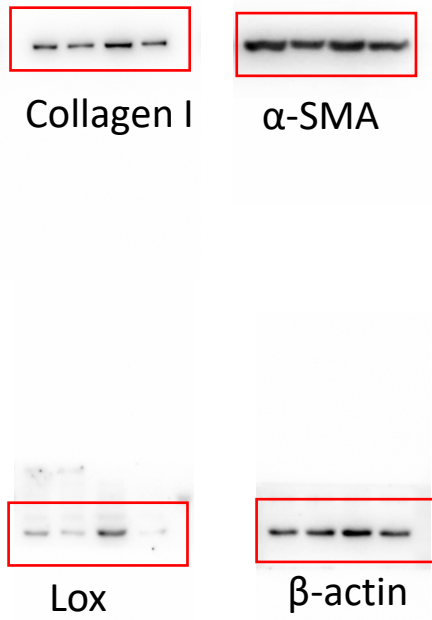

**Fig. 4H**

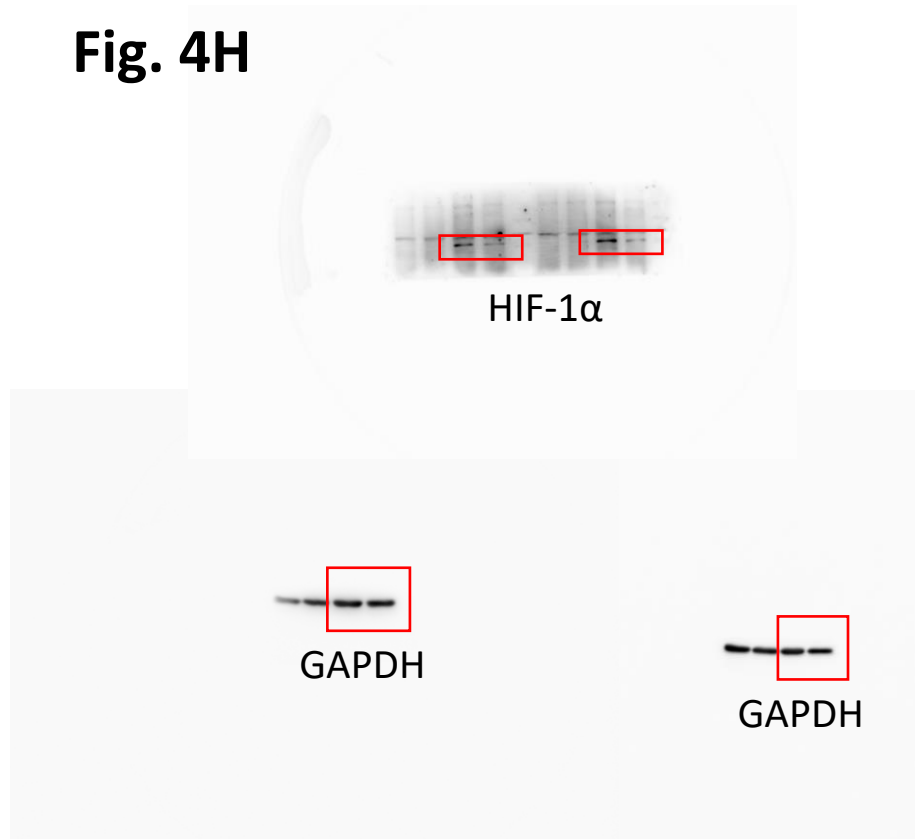

**Fig. 4I**

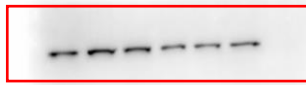

Collagen I

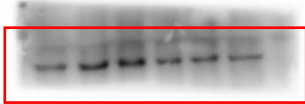

Lox

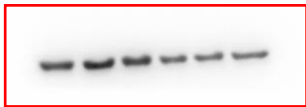

$\alpha$ -SMA

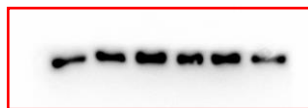

GAPDH

**Fig. 4J**

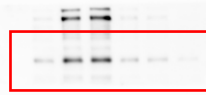

Collagen I

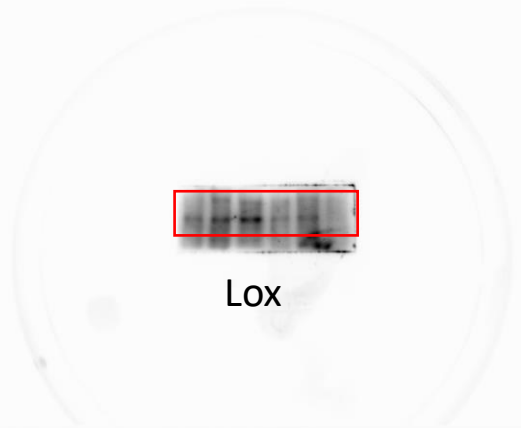

Lox

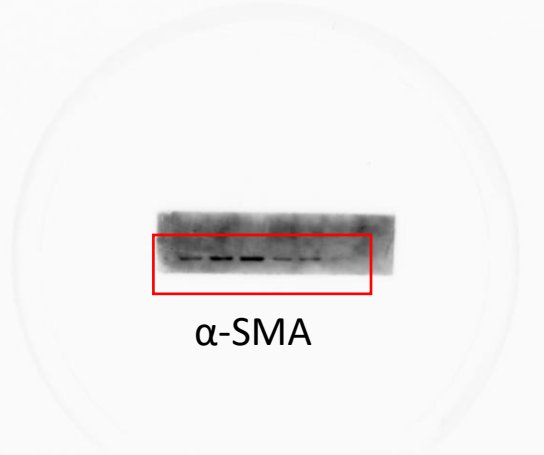

$\alpha$ -SMA

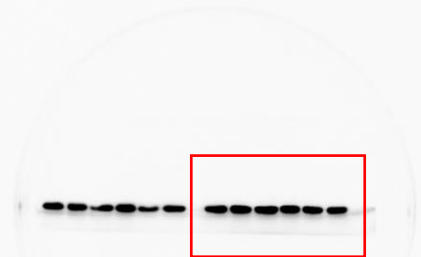

GAPDH

**Fig. 5A**

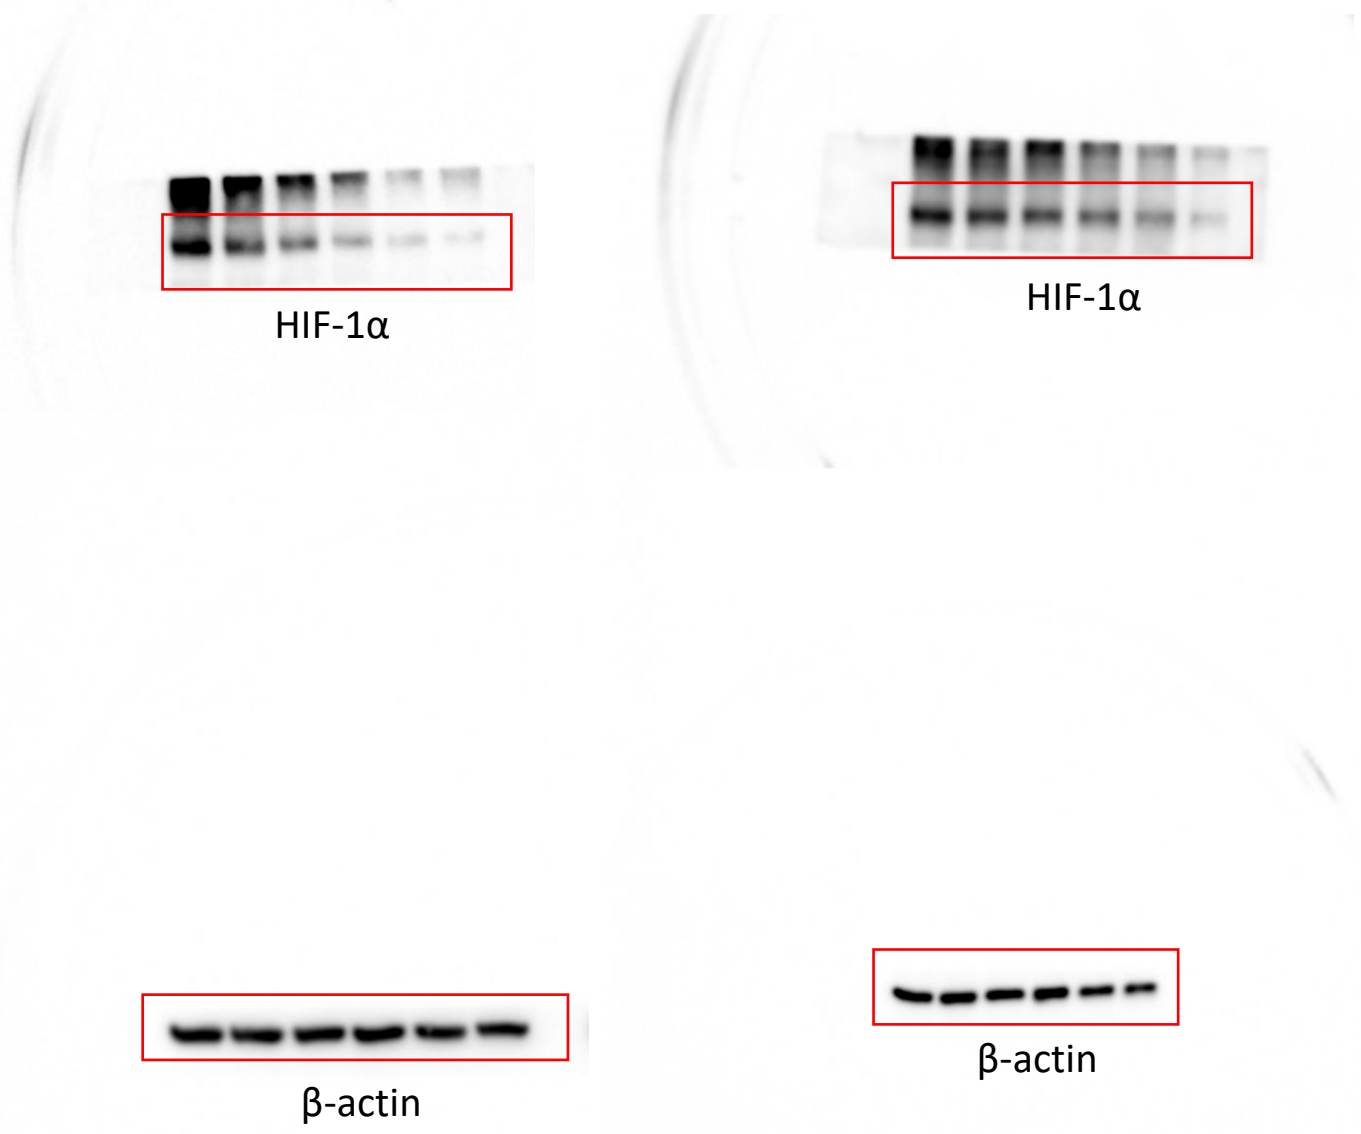

**Fig. 5B**

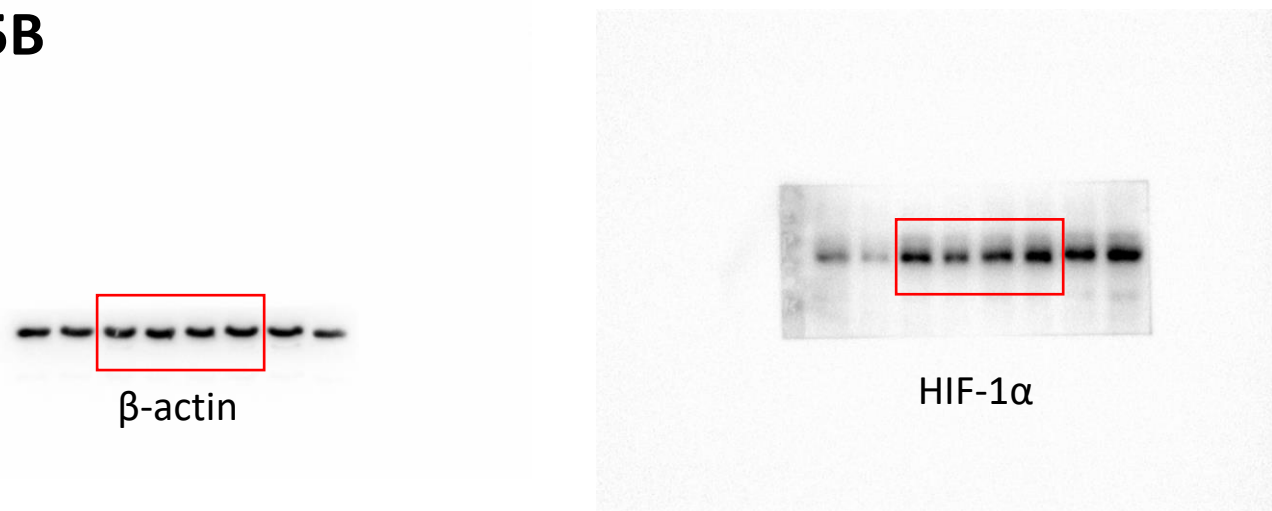

Fig. 5C

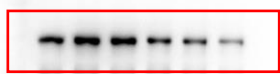

Collagen I

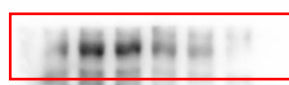

P-AKT

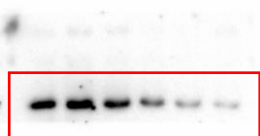

Lox

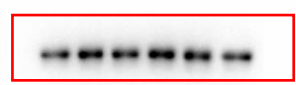

AKT

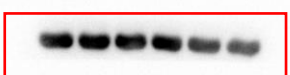

$\alpha$ -SMA

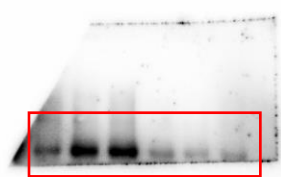

P-MDM2

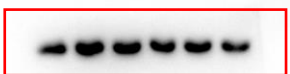

GAPDH

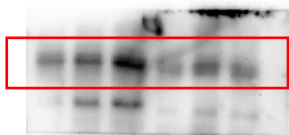

HIF-1 $\alpha$



**Fig. 6E**

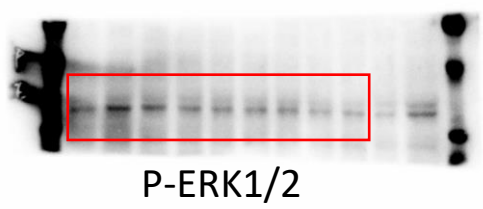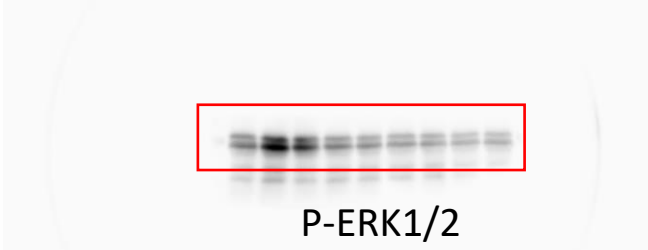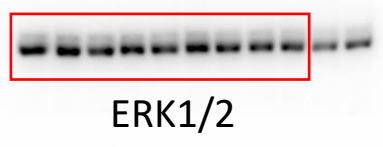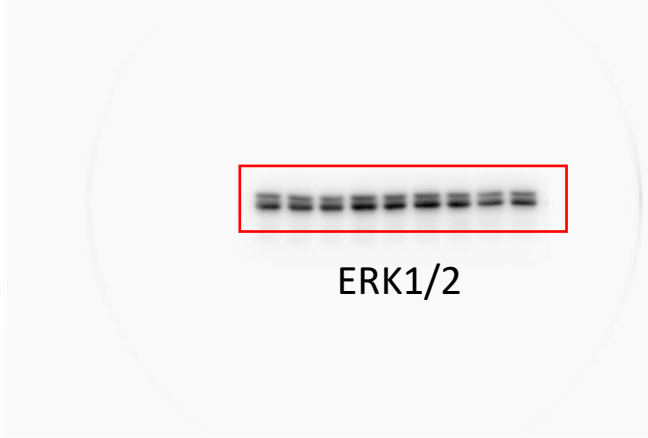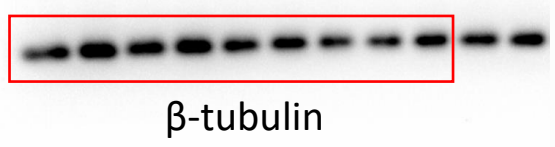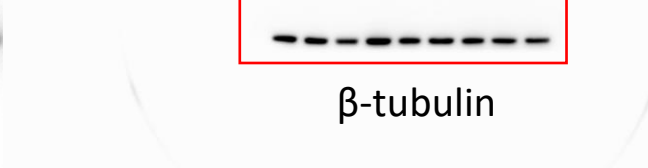

**Fig. 6F**

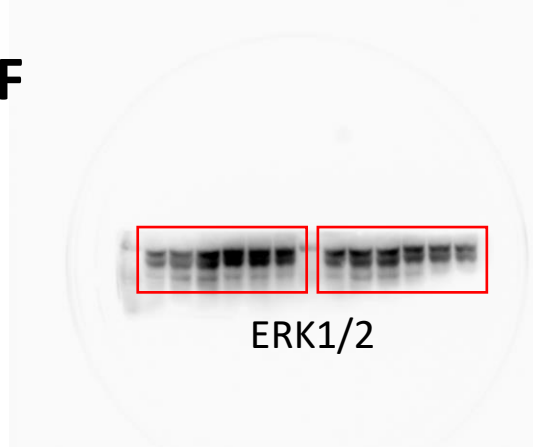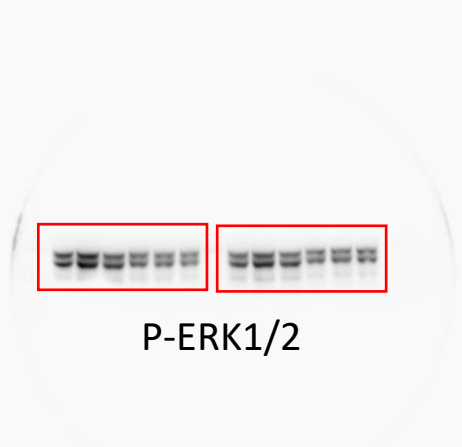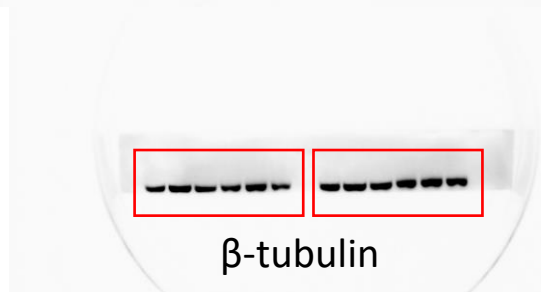

**Fig. 6G**

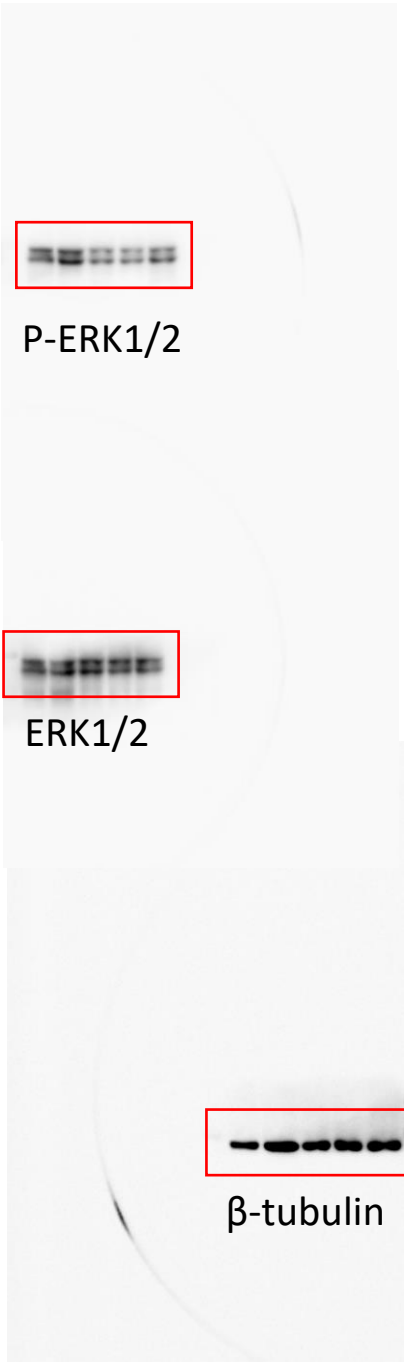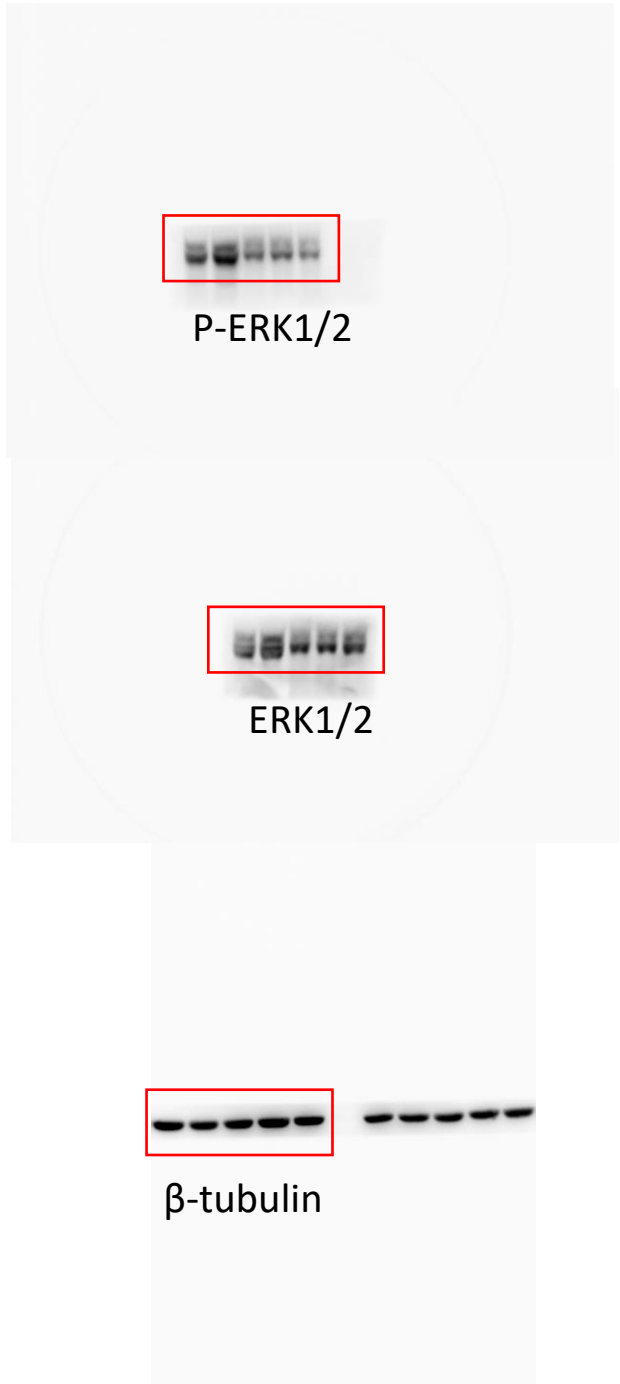

# Supplementary Figure. 1B

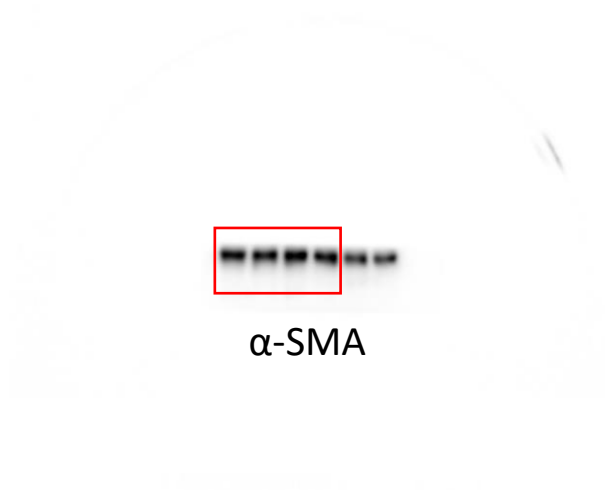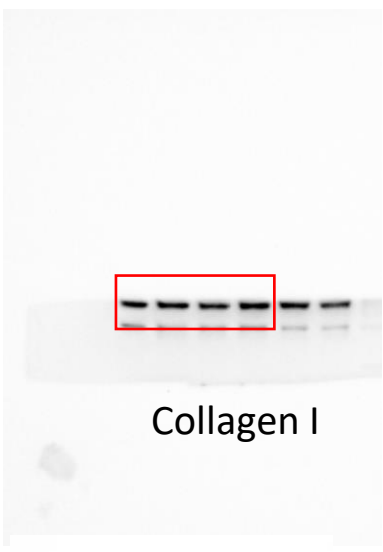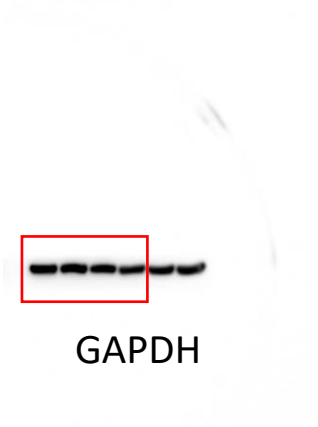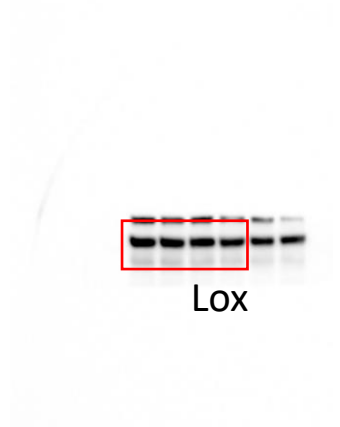

Supplement: 41419_2022_4979_MOESM5_ESM.pdf [file 41419_2022_4979_MOESM5_ESM.pdf]
